# Supplementary material for: A Thermosensitive, Chitosan-Based Hydrogel as Delivery System for Antibacterial Liposomes to Surgical Site Infections
Source: MDPI journal article supplement (doi:10.3390/pharmaceutics14122841), 2022-12-18
Supplement: s1 [file s1]

## Supplementary file

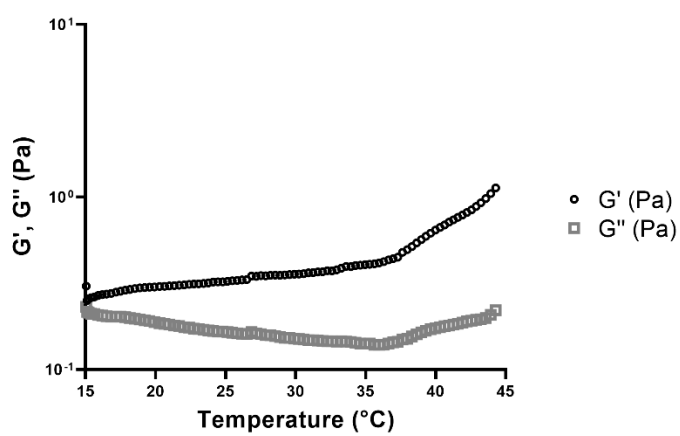

**Supplementary Figure S1.** Representative rheological curves of temperature-dependent sol-gel transition of autoclaved chitosan with sterile filtered  $\beta$ -glycerophosphate (CS- $\beta$ GP; molar ratio 1:4.88). Measurement of the storage modulus ( $G'$ ) and loss modulus ( $G''$ ) during a temperature range.
